# Supplementary material
Source: Springer Nature journal article supplement (https://www.springermedizin.de/resource/supplementary/12936_2008_853_MOESM6_ESM.pdf/9548384)

DIC

DB75

Draq5

Overlay

Overlay w/ DIC

A

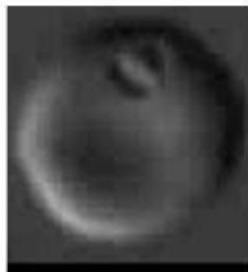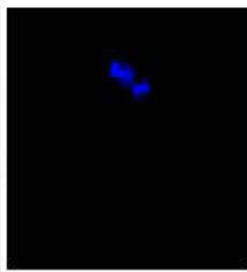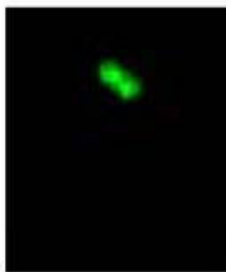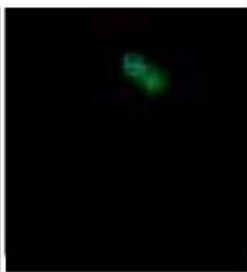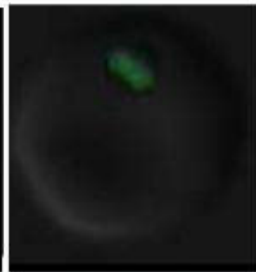

B

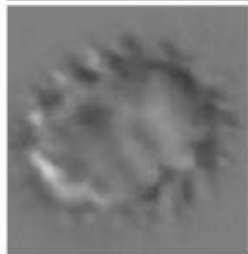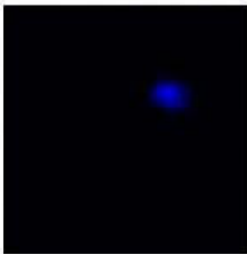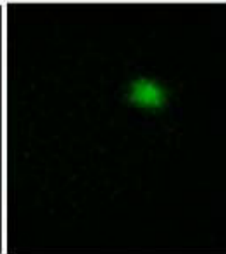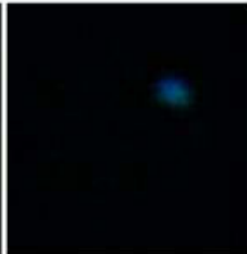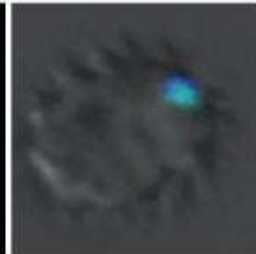

Supplement: MOESM6 [file 9548384]
